# Supplementary material for: Examining the Relationship Between COVID-19 Prevalence and Depression Care at Community Health Centers: Assessing 2020 Data
Source: Atypon-hosted journal article supplement (doi:10.1176/appi.ps.202100478), 2021-10-27
Supplement: appi.ps.202100478.ds001.pdf [file appi.ps.202100478.ds001.pdf]

**Online supplement for DOI 10.1176/appi.ps.202100478**

Table 1. Associations between patient population COVID-19 prevalence and the percentage of eligible patients who had depression care follow-up plan documented: 2020.

|                                                                        | Model 1     |        | Model 2     |       |
|------------------------------------------------------------------------|-------------|--------|-------------|-------|
|                                                                        | Coefficient | SE     | Coefficient | SE    |
| Patients diagnosed with COVID-19, %                                    | -0.47*      | 0.238  |             |       |
| Patients tested for COVID-19, %                                        |             |        | -0.10*      | 0.053 |
| Patient population non-Hispanic black, %                               | 0.15*       | 0.065  | 0.16*       | 0.064 |
| Patient population non-Hispanic white, %                               | 0.21**      | 0.062  | 0.22**      | 0.062 |
| Patient population Hispanic, %                                         | 0.21**      | 0.069  | 0.21**      | 0.07  |
| Patient population uninsured, %                                        | 0.05        | 0.052  | 0.08        | 0.053 |
| Patient population living below poverty, %                             | 0.06+       | 0.035  | 0.07+       | 0.035 |
| Patient population diagnosed with obesity, %                           | 0.30**      | 0.037  | 0.31**      | 0.038 |
| Total supplemental COVID-19 funding;<br>\$10,000s                      | -0.002      | 0.011  | -0.002      | 0.011 |
| Total patients; 1,000s                                                 | 0.02        | 0.037  | 0.02        | 0.037 |
| State-level COVID-19 cases per capita<br>(cumulative by December 2020) | 124.00**    | 44.954 | 107.50*     | 43.33 |
| Constant                                                               | 30.36**     | 5.992  | 29.62**     | 6.065 |
| Observations                                                           | 1,113       |        | 1,113       |       |
| R-squared                                                              | 0.11        |        | 0.12        |       |

Notes: Estimates using data from the UDS and the New York Times. There were  $N = 1,113$  observations. SE indicates Huber-White standard errors. +  $P < 0.10$ , \*  $P < 0.05$ , \*\*  $P < 0.01$ .
